## The effects of preventive counseling with remote support via e-mail on illness perception in patients with paroxysmal atrial fibrillation after catheter ablation

Pogosova N.<sup>1</sup>; Ovchinnikova AI.<sup>2</sup>; Yufereva YM.<sup>1</sup>; Sokolova OY.<sup>1</sup>; Davtyan KV.<sup>3</sup>; Ausheva AK.<sup>1</sup>

<sup>1</sup>National Medical Research Center of Cardiology, Moscow, Russian Federation

<sup>2</sup>Federal State Budgetary Institution "9 Diagnostic and Treatment Center" of the Ministry of Defense, Moscow, Russian Federation

<sup>3</sup>National Center for Preventive Medicine, Moscow, Russian Federation

**Funding Acknowledgements:** Type of funding sources: None.

**Background:** Illness perception (IP) affects health behaviors and coping strategies in chronic diseases, but our knowledge about IP in atrial fibrillation (AF) patients (pts) after catheter ablation (CA) is limited.

**Purpose:** To assess the impact of preventive counseling on IP in pts after AF catheter ablation.

**Methods:** A prospective randomized controlled study with 2 parallel groups of pts with paroxysmal AF after CA (radiofrequency or cryoablation). Pts were randomized (1:1) into 2 groups. Before discharge, both groups received 1 preventive counseling session with focus on their individual risk factors profile. After discharge pts from intervention group received 6 sessions of biweekly remote preventive counseling via e-mail over the first 3 months. Control group received usual care. IP was assessed using The Brief Illness Perception Questionnaire (BIPQ) at baseline and at 3, 6 and 12 months.

**Results:** A total of 90 pts aged 35 to 80 years were enrolled (mean age, 57.4 ± 9.9 years, men, 52.2%). The groups were well balanced according to demographic and clinical features. At 6 and 12 months of follow-up there was a significant improvement of the overall IP score in the intervention group vs control (table).

**Conclusions:** Preventive counseling with remote support via e-mail improves IP in AF pts after CA which may contribute to better long term outcomes.

| The overall score of IP          | Intervention group   | Control group       | P for change vs baseline |
|----------------------------------|----------------------|---------------------|--------------------------|
| Baseline (points)                |                      |                     |                          |
| mean ± SD                        | 42.2 ± 10.2          | 44.4 ± 9.5          | n/s                      |
| Me (25%; 75%)                    | 44 (35; 48.5)        | 45 (37; 51.5)       |                          |
| At 3 months (points)             |                      |                     |                          |
| mean ± SD                        | 36.8 ± 8.1*          | 39.7 ± 7.9*         | 0.055                    |
| Me (25%; 75%)                    | 37 (33; 41)          | 41 (33.5; 47)       |                          |
| Δ% after 3 months, Me (25%; 75%) | -14.3 (-23.2; 5.2)   | -13.0 (-16.8; -4.6) | n/s                      |
| At 6 months (points)             |                      |                     |                          |
| mean ± SD                        | 32.4 ± 7.3*          | 37.7 ± 8.7*         | 0.008                    |
| Me (25%; 75%)                    | 33 (27; 38)          | 37 (31; 44.5)       |                          |
| Δ% after 6 months, Me (25%; 75%) | -24.2 (-33.7; -5.9)  | -18.4 (-24.0; -5.9) | 0.040                    |
| At 12 months (points)            |                      |                     |                          |
| mean ± SD                        | 29.4 ± 7.6*          | 36.9 ± 8.2*         | <0.001                   |
| Me (25%; 75%)                    | 29 (24.5; 33.5)      | 36 (31; 43)         |                          |
| Δ% after 12 months, Me           | -33.3 (-42.5; -17.1) | -18.4 (-26.4; -7.5) | <0.001                   |

SD – standard deviation, Me – median; \* p < 0.001 vs baseline within group
